# Supplementary material for: SWPhylo – A Novel Tool for Phylogenomic Inferences by Comparison of Oligonucleotide Patterns and Integration of Genome-Based and Gene-Based Phylogenetic Trees
Source: PubMed Central journal article supplement — Evol Bioinform Online. 2018 Feb 20;14:1176934318759299. doi: 10.1177/1176934318759299 (PMC5826093; doi:10.1177/1176934318759299), 2018-02-20
Supplement: Supplementary_Table1.pdf [file Supplementary_Table1.pdf]

| Taxonomic group | GenBank accession number | Organism                                                    |
|-----------------|--------------------------|-------------------------------------------------------------|
| Bacillus        | NC_000964                | <i>B. subtilis</i> 168                                      |
|                 | NC_002570                | <i>B. halodurans</i> C-125                                  |
|                 | NC_003909                | <i>B. cereus</i> ATCC 10987                                 |
|                 | NC_006270                | <i>B. licheniformis</i> ATCC 14580                          |
|                 | NC_006582                | <i>B. clausii</i> KSM-K16                                   |
|                 | NC_009674                | <i>B. cytotoxicus</i> NVH 391-98                            |
|                 | NC_009848                | <i>B. pumilus</i> SAFR-032                                  |
|                 | NC_013791                | <i>B. pseudofirmus</i> OF4                                  |
|                 | NC_014103                | <i>B. megaterium</i> DSM 319                                |
|                 | NC_014829                | <i>B. cellulosilyticus</i> DSM 2522                         |
|                 | NC_015634                | <i>B. coagulans</i> 2-6                                     |
| Corynebacteria  | NC_003450                | <i>C. glutamicum</i> ATCC 13032                             |
|                 | NC_004369                | <i>C. efficiens</i> YS-314                                  |
|                 | NC_007164                | <i>C. jeikeium</i> K411                                     |
|                 | NC_010545                | <i>C. urealyticum</i> DSM 7109                              |
|                 | NC_012704                | <i>C. kroppenstedtii</i> DSM 44385                          |
|                 | NC_015673                | <i>C. resistens</i> DSM 45100                               |
|                 | NC_015859                | <i>C. variabile</i> DSM 44702                               |
|                 | NC_016781                | <i>C. pseudotuberculosis</i> 3/99-5                         |
|                 | NC_016785                | <i>C. diphtheriae</i> CDCE 8392                             |
|                 | NC_017317                | <i>C. ulcerans</i> 809                                      |
|                 | NC_020302                | <i>C. halotolerans</i> DSM 44683                            |
|                 | NC_021663                | <i>C. terpenotabidum</i> Y-11                               |
|                 | NC_021915                | <i>C. maris</i> DSM 45190                                   |
| Enterobacteria  | NC_002488                | <i>Xylella fastidiosa</i> 9a5c                              |
|                 | NC_003919                | <i>Xanthomonas axonopodis</i> pv. <i>citri</i> 306          |
|                 | NC_004347                | <i>Shewanella oneidensis</i> MR-1                           |
|                 | NC_004556                | <i>Xylella fastidiosa</i> Temecula1                         |
|                 | NC_004631                | <i>Salmonella enterica</i> subsp. <i>enterica</i> Typhi Ty2 |
|                 | NC_007954                | <i>Shewanella denitrificans</i> OS217                       |

|              |           |                                                                                   |
|--------------|-----------|-----------------------------------------------------------------------------------|
|              | NC_009085 | <i>Acinetobacter baumannii</i> ATCC 17978                                         |
|              | NC_009832 | <i>Serratia proteamaculans</i> 568                                                |
|              | NC_010468 | <i>Escherichia coli</i> ATCC 8739                                                 |
|              | NC_010506 | <i>Shewanella woodyi</i> ATCC 51908                                               |
|              | NC_013971 | <i>Erwinia amylovora</i> ATCC 49946                                               |
| Lactobacilli | NC_005362 | <i>Lactobacillus johnsonii</i> NCC 533                                            |
|              | NC_006814 | <i>Lactobacillus acidophilus</i> NCFM                                             |
|              | NC_007576 | <i>Lactobacillus sakei</i> subsp. <i>sakei</i> 23K                                |
|              | NC_007929 | <i>Lactobacillus salivarius</i> UCC118                                            |
|              | NC_008054 | <i>Lactobacillus delbrueckii</i> subsp. <i>bulgaricus</i><br>ATCC 11842           |
|              | NC_008497 | <i>Lactobacillus brevis</i> ATCC 367                                              |
|              | NC_008526 | <i>Lactobacillus casei</i> ATCC 334<br>( <i>Lactobacillus paracasei</i> ATCC 334) |
|              | NC_008530 | <i>Lactobacillus gasseri</i> ATCC 33323                                           |
|              | NC_009004 | <i>Lactococcus lactis</i> subsp. <i>cremoris</i><br>MG1363                        |
|              | NC_009513 | <i>Lactobacillus reuteri</i> DSM 20016                                            |
|              | NC_010080 | <i>Lactobacillus helveticus</i> DPC 4571                                          |
|              | NC_010610 | <i>Lactobacillus fermentum</i> IFO 3956                                           |
|              | NC_013198 | <i>Lactobacillus rhamnosus</i> GG                                                 |
|              | NC_014106 | <i>Lactobacillus crispatus</i> ST1                                                |
|              | NC_014554 | <i>Lactobacillus plantarum</i> subsp. <i>plantarum</i><br>ST-III                  |
|              | NC_014724 | <i>Lactobacillus amylovorus</i> GRL 1112                                          |
|              | NC_015214 | <i>Lactobacillus acidophilus</i> 30SC                                             |
|              | NC_015428 | <i>Lactobacillus buchneri</i> NRRL B-30929                                        |
|              | NC_015602 | <i>Lactobacillus kefirifaciens</i> ZW3                                            |
|              | NC_015930 | <i>Lactococcus garvieae</i> ATCC 49156                                            |
|              | NC_015975 | <i>Lactobacillus ruminis</i> ATCC 27782                                           |
|              | NC_015978 | <i>Lactobacillus sanfranciscensis</i> TMW<br>1.1304                               |
| Mycobacteria | NC_000962 | <i>M. tuberculosis</i> H37Rv                                                      |
|              | NC_002677 | <i>M. leprae</i> TN                                                               |

|                 |           |                                                                 |
|-----------------|-----------|-----------------------------------------------------------------|
|                 | NC_002944 | <i>M. avium</i> subsp. <i>paratuberculosis</i> K-10             |
|                 | NC_008146 | <i>Mycobacterium</i> sp. MCS                                    |
|                 | NC_008595 | <i>M. avium</i> 104                                             |
|                 | NC_008596 | <i>M. smegmatis</i> str. MC2 155                                |
|                 | NC_008611 | <i>M. ulcerans</i> Agy99                                        |
|                 | NC_008705 | <i>Mycobacterium</i> sp. KMS                                    |
|                 | NC_008726 | <i>M. vanbaalenii</i> PYR-1                                     |
|                 | NC_009077 | <i>Mycobacterium</i> sp. JLS                                    |
|                 | NC_009338 | <i>M. gilvum</i> PYR-GCK                                        |
|                 | NC_010397 | <i>M. abscessus</i>                                             |
|                 | NC_010612 | <i>M. marinum</i> M                                             |
|                 | NC_015576 | <i>Mycobacterium</i> sp. JDM601                                 |
|                 | NC_016947 | <i>M. intracellulare</i> MOTT-02                                |
|                 | NC_017904 | <i>Mycobacterium</i> sp. MOTT36Y                                |
| Prochlorococcus | NC_005042 | <i>P. marinus</i> subsp. <i>marinus</i> str. CCMP1375           |
|                 | NC_005072 | <i>P. marinus</i> subsp. <i>pastoris</i> str. CCMP1986          |
|                 | NC_007335 | <i>P. marinus</i> str. NATL2A                                   |
|                 | NC_007577 | <i>P. marinus</i> str. MIT 9312                                 |
|                 | NC_008816 | <i>P. marinus</i> str. AS9601                                   |
|                 | NC_008817 | <i>P. marinus</i> str. MIT 9515                                 |
|                 | NC_008819 | <i>P. marinus</i> str. NATL1A                                   |
|                 | NC_009091 | <i>P. marinus</i> str. MIT 9301                                 |
|                 | NC_009840 | <i>P. marinus</i> str. MIT 9215                                 |
|                 | NC_009976 | <i>P. marinus</i> str. MIT 9211                                 |
| Pseudomonas     | NC_002516 | <i>P. aeruginosa</i> PAO1                                       |
|                 | NC_002947 | <i>P. putida</i> KT2440                                         |
|                 | NC_004129 | <i>P. protegens</i> Pf-5                                        |
|                 | NC_007005 | <i>P. syringae</i> pv. <i>syringae</i> B728a                    |
|                 | NC_007492 | <i>P. fluorescens</i> Pf0-1                                     |
|                 | NC_008027 | <i>P. entomophila</i> L48                                       |
|                 | NC_015379 | <i>P. brassicacearum</i> subsp. <i>brassicacearum</i><br>NFM421 |
|                 | NC_015410 | <i>P. mendocina</i> NK-01                                       |

|            |           |                                        |
|------------|-----------|----------------------------------------|
|            | NC_015556 | <i>P. fulva</i> 12-X                   |
|            | NC_015740 | <i>P. stutzeri</i> ATCC 17588          |
|            | NC_017986 | <i>P. putida</i> ND6                   |
|            | NC_020829 | <i>P. denitrificans</i> ATCC 13867     |
| Thermotoga | NC_000853 | <i>Thermotoga maritima</i> MSB8        |
|            | NC_009486 | <i>Thermotoga petrophila</i> RKU-1     |
|            | NC_009828 | <i>Thermotoga lettingae</i> TMO        |
|            | NC_010483 | <i>Thermotoga</i> sp. RQ2              |
|            | NC_011978 | <i>Thermotoga neapolitana</i> DSM 4359 |
|            | NC_013642 | <i>Thermotoga naphthophila</i> RKU-10  |
|            | NC_014926 | <i>Thermovibrio ammonificans</i> HB-1  |
|            | NC_015707 | <i>Thermotoga thermarum</i> DSM 5069   |
|            | NC_016148 | <i>Thermovirga lienii</i> DSM 17291    |
